# Supplementary material for: Sumoylation is Required for the Cytoplasmic Accumulation of a Subset of mRNAs
Source: Genes (Basel). 2014 Oct 20;5(4):982–1000. doi: 10.3390/genes5040982 (PMC4276922; doi:10.3390/genes5040982)
Supplement: Supplementary File 1 [file genes-05-00982-s001.xlsx]

## Sheet: Sheet1
Gene	NCBI Gene ID	Western blot assessment of knockdown
Acin1	22985	NT
Aly	10189	Depleted
AQR	9716	NT
C1orf77	26097	NT
CBP80	4686	NT
CBX4	8535	NT
CCNB1IP1	57820	NT
CPSF6	11052	NT
CRNKL1	51340	NT
CTIF	9811	NT
Dbp5	11269	NT
DDX25	29118	NT
DDX3X	1654	NT
EGR2	1959	NT
eIF4AIII	192170	Depleted
eIF4E	1977	NT
GANP	8888	Depleted
GLE1	2733	NT
hnRNPC	3183	NT
IP6K2	51447	NT
Ipk2	253430	NT
ISW1	8467	NT
ISY1	57461	NT
IWS1	55677	NT
NSMCE2	286053	NT
NXF1	10482	NT
NXF2	56001	NT
PABPN1	8106	NT
PCF11	51585	NT
PHAX	51808	Depleted
PIAS1	8554	NT
PIAS2	9063	NT
PIAS3	10401	NT
PIAS4	51588	NT
Pinin	5411	NT
POLDIP3	84271	NT
RAE1	8480	NT
RanBP2	5903	Depleted
RNPS1	10921	Depleted
Sap18	10284	NT
SFRS1	6426	NT
SFRS2	6427	Not depleted
SFRS3	6428	NT
SFRS7	6432	NT
SUPT6H	6830	NT
THOC1	9984	Depleted
THOC2	57187	NT
TRAF7	84231	NT
TRIM28	10155	NT
U2AF65	11338	Depleted
UAP56	7919	Depleted
UBC9	7329	Depleted
UIF	84248	NT
UPF1	5976	Depleted
URH49	10212	Depleted
XAB2	56949	NT
ZC3H11A	9877	NT
ZC3H3	23144	NT
ZMIZ1	57178	NT
ZMIZ2	83637	NT
Table S1. List of factors screened for the cytoplasmic accumulation of MHC-ftz-i.
The table includes each gene name, NCBI Gene ID number and whether the shRNA treatment resulted in a decrease in protein by western blot. Note that most of the knockdowns were not tested (“NT”) for protein depletion.
